# Supplementary material for: Dynamics of Known Long Non-Coding RNAs during the Maternal-to-Zygotic Transition in Rabbit
Source: MDPI journal article supplement (doi:10.3390/ani11123592), 2021-12-19
Supplement: s1 [file s1]

**Table S1. Primers of genes used in RT-qPCR.**

| Gene ID            | Primer sequence                                       | Product length (bp) |
|--------------------|-------------------------------------------------------|---------------------|
| <i>GAPDH</i>       | F: CTTCGGCATTGTGGAGGG<br>R: GGAGGCAGGGATGATGTTCT      | 130                 |
| ENSOCUG00000036653 | F: GTGGTGCCTACCCTCTTGAC<br>R: TATCTCGCTTGCCTTGGGTG    | 97                  |
| ENSOCUG00000002935 | F: GCACGATGTCCTTCAGGGTT<br>R: GCTTCCCTGACCAGTACGTC    | 184                 |
| ENSOCUG00000032001 | F: GGAGACCCACAACTGCGTA<br>R: TAAGGACACTGAACCACGGC     | 109                 |
| ENSOCUG00000037217 | F: TGTTTCCGTCTCTGGGTTC<br>R: CCCAGGACATTCCCCAATCC     | 148                 |
| ENSOCUG00000034943 | F: AGTGTTGAGCGTGGGAAGAT<br>R: ACACACAGAAGCCTGAGGTC    | 104                 |
| ENSOCUG00000036338 | F: TGCTGGTTTGGGTTTGACTTG<br>R: GGTTCCACTTGAATGCAGGGTA | 80                  |
